# Supplementary material for: Telephone-based support for physical activity: Results and lessons learned during the COVID-19 pandemic
Source: PLOS journal article supplement (doi:10.1371/journal.pone.0268429), 2022-05-18
Supplement: S1 (10.1371/journal.pone.0268429.s001) [file journal.pone.0268429.s001]

NAME: Write exact response DOB: MM/DD/YYYY TODAY'S DATE: MM/DD/YYYY

**1. Think about a typical week, prior to the current coronavirus situation.**

In a typical week, do you do planned physical activity or exercise? 1 Yes 2 No [Skip to 3]

Which exercise do you do most frequently? Write exact response

How many days in a typical week do you do this activity?

0 None 1 1 day 2 2 days 3 3 days 4 4 days 5 5 days 6 6 days 7 7 days

How much time in a typical day do you do this activity? Write exact response minutes

When you do this activity, do your heart rate and breathing increase?

0 No 1 Yes, a small increase 2 Yes, a moderate increase 3 Yes, a large increase

What is the second most frequent exercise you do? Write exact response

How many days in a typical week do you do this activity?

0 None 1 1 day 2 2 days 3 3 days 4 4 days 5 5 days 6 6 days 7 7 days

How much time in a typical day do you do this activity? Write exact response minutes

When you do this activity, do your heart rate and breathing increase?

0 No 1 Yes, a small increase 2 Yes, a moderate increase 3 Yes, a large increase

**2. Think about a typical week, prior to the current coronavirus situation.**

How many days in a typical week do you usually exercise at home?

0 None 1 1 day 2 2 days 3 3 days 4 4 days 5 5 days 6 6 days 7 7 days

**3. Think about a typical week, prior to the current coronavirus situation. On a scale of 1 to 5, with 1 being never and 5 being many times, please rate how often you...**

|                                                                                             | Never | Almost<br>Never | Some-<br>times | Often | Many<br>Times |
|---------------------------------------------------------------------------------------------|-------|-----------------|----------------|-------|---------------|
| You keep track of how much physical activity you do.                                        | 1     | 2               | 3              | 4     | 5             |
| You reward yourself for being physically active.                                            | 1     | 2               | 3              | 4     | 5             |
| You tell yourself that you can start again when your physical activity plans get off track. | 1     | 2               | 3              | 4     | 5             |
| You have someone who encourages you to do physical activity.                                | 1     | 2               | 3              | 4     | 5             |
| You set goals to do physical activity.                                                      | 1     | 2               | 3              | 4     | 5             |
| You set aside time to exercise.                                                             | 1     | 2               | 3              | 4     | 5             |

**4. Think about a typical week, prior to the current coronavirus situation. On a scale of 1 to 5, with 1 being not at all confident and 5 being extremely confident, please rate how confident you are that you can exercise...**

|                                                                                | Not at all<br>Confident | Somewhat<br>Confident | Moderately<br>confident | Very<br>Confident | Extremely<br>confident |
|--------------------------------------------------------------------------------|-------------------------|-----------------------|-------------------------|-------------------|------------------------|
| ...When you are at home.                                                       | 1                       | 2                     | 3                       | 4                 | 5                      |
| ...When the weather is bad.                                                    | 1                       | 2                     | 3                       | 4                 | 5                      |
| ...When you do not have a fitness advisor with you.                            | 1                       | 2                     | 3                       | 4                 | 5                      |
| Make time for at least 30 minutes each day of physical activity, like walking. | 1                       | 2                     | 3                       | 4                 | 5                      |

**5. Think about the place that you stay. What things do you have at home that could help you be active?**

|                                       |       |      |
|---------------------------------------|-------|------|
| A safe space to walk outside?         | 1 Yes | 2 No |
| A treadmill or exercise bike at home? | 1 Yes | 2 No |
| A kitchen chair?                      | 1 Yes | 2 No |
| Free weights?                         | 1 Yes | 2 No |
| Other: _ Write exact response _____   |       |      |

**6. The Wellness Center is closed during the current coronavirus situation. What are your goals for exercise while the Wellness Center is closed? (Please help the patient articulate their goal as a SMART goal.)**

**Patient's exact words:**

*Write exact response*

**SMART goal:**

*Write exact response*

**7. EXERCISE PRESCRIPTION. Next week, you should do this exercise:**

*Write exact response*

**8. FITNESS ADVISOR NOTES:**

*Write exact response*
